# Supplementary material for: A field test of forest canopy structure measurements with the CanopyCapture smartphone application
Source: PeerJ. 2022 May 13;10:e13450. doi: 10.7717/peerj.13450 (PMC9109689; doi:10.7717/peerj.13450)
Supplement: Supplemental Information 1 [file peerj-10-13450-s001.xlsx]

## Sheet: Comparison with LAI-2200C
Forest	CanopyCapture (% gap fraction)			LAI-2200C Canopy Analyzer
	Standard	Wide-angle		(% gap fraction)
Okataina old-growth	9	8		0.46701
Okataina old-growth	15	11		1.22006
Okataina old-growth	10	6		0.10974
Okataina old-growth	8	11		3.80427
Okataina old-growth	9	10		0.506287
Okataina old-growth	10	9		0.349787
Okataina old-growth	9	9		0.361199
Okataina old-growth	9	9		0.817323
Okataina old-growth	15	22		3.0069
Okataina old-growth	11	13		1.49068
Okataina old-growth	9	10		0.849023
Okataina old-growth	13	12		0.420434
Okataina old-growth	7	6		0.60811
Okataina old-growth	12	12		0.48163
Okataina old-growth	9	9		0.353809
Okataina old-growth	12	12		0.56135
Okataina old-growth	7	8		0.309349
Okataina old-growth	11	12		0.582907
Okataina old-growth	7	8		0.317855
Okataina old-growth	10	12		0.334337
Okataina old-growth	11	12		1.18524
Okataina old-growth	15	15		1.36441
Okataina old-growth	17	16		0.98456
Okataina old-growth	14	11		1.55836
Okataina old-growth	10	9		0.780567
Okataina old-growth	11	15		0.95722
Okataina old-growth	9	8		0.311905
Okataina old-growth	15	18		3.56195
Okataina old-growth	13	12		2.82468
Okataina old-growth	29	22		7.7047
Mamaku even-aged	14	15		5.32242
Mamaku even-aged	11	12		2.223
Mamaku even-aged	18	15		2.3218
Mamaku even-aged	11	14		2.84158
Mamaku even-aged	16	17		2.9577
Mamaku even-aged	14	15		2.3286
Mamaku even-aged	19	16		5.0741
Mamaku even-aged	13	15		2.24615
Mamaku even-aged	11	13		0.95841
Mamaku even-aged	15	15		1.57893
Mamaku even-aged	17	15		1.56594
Mamaku even-aged	14	13		0.90981
Mamaku even-aged	14	13		1.0757
Mamaku even-aged	11	12		0.68302
Mamaku even-aged	14	16		1.10282
Mamaku even-aged	15	13		1.61897
Mamaku even-aged	15	14		2.3682
Mamaku even-aged	17	15		4.4751
Mamaku even-aged	16	15		2.6846
Mamaku even-aged	14	13		3.0787
Mamaku even-aged	13	14		2.892
Mamaku even-aged	17	18		2.0828
Mamaku even-aged	12	14		8.3624
Mamaku even-aged	12	14		1.59014
Mamaku even-aged	13	14		2.8255
Mamaku even-aged	12	11		1.80078
Mamaku even-aged	14	16		1.76869
Mamaku even-aged	18	17		1.99682
Mamaku even-aged	14	15		2.6324

## Sheet: Effect of sky condition
Comparison of CanopyCapture measurements under sunny and overcast conditions
Sunny	Overcast
89	87
86	84
86	86
87	87
90	90
83	81
87	87
84	84
80	82
87	84
78	80
83	84
86	87
79	81
84	86
81	78
80	82
84	84
91	90
75	77
89	90
81	84
79	83
79	82
79	81
88	89
79	80

## Sheet: Effect of phone model
CanopyCapture compared on three different smartphones
Samsung A21s	Samsung S20	Sony H4113
82	80	76
86	85	71
77	77	76
76	74	74
78	74	74
79	78	83
80	73	84
77	76	82
82	80	77
83	78	67
77	76	76
70	60	67
12	10	37
57	45	56
62	44	55
